# Supplementary material
Source: PubMed Central journal article supplement (PMC5743639)
Supplement: EHP1203.s001.acco.pdf [file EHP1203.s001.acco.pdf]

**Note to readers with disabilities:** *EHP* strives to ensure that all journal content is accessible to all readers. However, some figures and Supplemental Material published in *EHP* articles may not conform to [508 standards](#) due to the complexity of the information being presented. If you need assistance accessing journal content, please contact [ehponline@niehs.nih.gov](mailto:ehponline@niehs.nih.gov). Our staff will work with you to assess and meet your accessibility needs within 3 working days.

## **Supplemental Material**

### **Plasma Perfluoroalkyl and Polyfluoroalkyl Substances Concentration and Menstrual Cycle Characteristics in Preconception Women**

Wei Zhou, Lulu Zhang, Chuanliang Tong, Fang Fang, Shasha Zhao, Ying Tian,  
Yexuan Tao, and Jun Zhang, for the Shanghai Birth Cohort Study

#### **Table of Contents**

**Table S1.** Characteristics of the study population (n=950) and preconception women without PFASs levels (n=232) in Shanghai, China, 2013-2015.

**Table S2.** Associations between PFASs (ng/mL) and irregular cycles in preconception women in Shanghai, China, 2013-2015.

**Table S3.** Associations between PFASs (ng/mL) and long cycles in preconception women in Shanghai, China, 2013-2015.

**Table S4.** Associations between PFASs (ng/mL) and short cycles in preconception women in Shanghai, China, 2013-2015.

**Table S5.** Associations between PFASs (ng/mL) and menorrhagia in preconception women in Shanghai, China, 2013-2015.

**Table S6.** Associations between PFASs (ng/mL) and hypomenorrhea in preconception women in Shanghai, China, 2013-2015.

**Table S1.** Characteristics of the study population(n=950) and preconception women without PFASs levels (n=232) in Shanghai, China, 2013-2015

| Characteristics                            | n=950             | n=232             | P    |
|--------------------------------------------|-------------------|-------------------|------|
| Age (years), median (p25; p75)             | 30 (28, 32)       | 30 (28, 32)       | 0.72 |
| missing, n (%)                             | 10 (1.1)          | 10 (4.3)          |      |
| Age at menarche (years), median (p25; p75) | 13 (13, 14)       | 13 (13, 14)       | 0.08 |
| missing, n (%)                             | 143 (15.1)        | 28 (12.1)         |      |
| Parity, n (%)                              |                   |                   | 0.31 |
| Nulliparous                                | 859 (91.0)        | 215 (93.1)        |      |
| Parous                                     | 85 (9.0)          | 16 (6.9)          |      |
| missing, n (%)                             | 6 (0.6)           | 1 (0.4)           |      |
| BMI, median (p25; p75)                     | 20.5 (19.1, 22.5) | 20.5 (19.4, 22.4) | 0.59 |
| missing, n (%)                             | 13 (1.4)          | 11 (4.7)          |      |
| Income (10 <sup>3</sup> CNY), n(%)         |                   |                   | 0.52 |
| 1                                          | 67 (7.5)          | 19 (9.1)          |      |
| 2                                          | 155 (17.3)        | 35 (16.7)         |      |
| 3                                          | 503 (56.2)        | 108 (51.7)        |      |
| 4                                          | 170 (19.0)        | 47 (22.5)         |      |
| missing, n (%)                             | 55 (5.8)          | 23 (9.9)          |      |
| Irregular cycle, n (%)                     | 190 (20.1)        | 37 (16.4)         | 0.22 |
| missing, n (%)                             | 3 (0.3)           | 7 (3.0)           |      |
| Short cycle (<21 days), n (%)              | 14 (1.5)          | 1 (0.4)           | 0.20 |
| Long cycle (>35 days), n (%)               | 189 (20.1)        | 41 (18.3)         | 0.49 |
| missing, n (%)                             | 12 (1.3)          | 8 (3.4)           |      |
| menorrhagia, n (%)                         | 63 (6.7)          | 16 (7.2)          | 0.67 |
| hypomenorrhea, n (%)                       | 76 (8.0)          | 26 (11.7)         | 0.08 |
| missing, n (%)                             | 3 (0.3)           | 9 (3.9)           |      |

**Table S2.** Associations between PFASs (ng/mL) and irregular cycles in preconception women in Shanghai, China, 2013-2015.

| PFASs                   | N   | Number of cycle characteristics | Crude OR (95%CI)  | Adjusted OR (95%CI) <sup>a</sup> |
|-------------------------|-----|---------------------------------|-------------------|----------------------------------|
| <b>PFDeA</b>            |     |                                 |                   |                                  |
| Continuous <sup>b</sup> | 947 | 190                             | 1.03 (0.81, 1.33) | 1.07 (0.82, 1.39)                |
| Q1(≤0.91)               | 235 | 44                              | ref               | ref                              |
| Q2(0.91-1.31)           | 240 | 52                              | 1.20 (0.77, 1.88) | 1.21 (0.76, 1.92)                |
| Q3(1.31-1.92)           | 232 | 51                              | 1.22 (0.78, 1.92) | 1.18 (0.74, 1.88)                |
| Q4(>1.92)               | 240 | 43                              | 0.95 (0.60, 1.51) | 0.97 (0.60, 1.58)                |
| <b>PFUA</b>             |     |                                 |                   |                                  |
| Continuous <sup>b</sup> | 947 | 190                             | 1.13 (0.84, 1.53) | 1.19 (0.87, 1.64)                |
| Q1(≤0.85)               | 238 | 41                              | ref               | ref                              |
| Q2(0.85-1.18)           | 236 | 56                              | 1.50 (0.95, 2.35) | 1.56 (0.98, 2.48)                |
| Q3(1.18-1.63)           | 234 | 45                              | 1.14 (0.72, 1.83) | 1.11 (0.69, 1.81)                |
| Q4(>1.63)               | 239 | 48                              | 1.21 (0.76, 1.92) | 1.23 (0.76, 1.99)                |
| <b>PFBS</b>             |     |                                 |                   |                                  |
| Continuous <sup>b</sup> | 947 | 190                             | 1.14 (0.74, 1.75) | 1.12 (0.71, 1.77)                |
| Q1(≤0.226)              | 242 | 52                              | ref               | ref                              |
| Q2(0.226-0.241)         | 232 | 39                              | 0.74 (0.47, 1.17) | 0.81 (0.50, 1.31)                |
| Q3(0.241-0.266)         | 232 | 46                              | 0.90 (0.58, 1.41) | 0.97 (0.61, 1.55)                |
| Q4(>0.266)              | 241 | 53                              | 1.03 (0.67, 1.59) | 1.09 (0.69, 1.72)                |
| <b>PFDoA</b>            |     |                                 |                   |                                  |
| Continuous <sup>b</sup> | 947 | 190                             | 1.12 (0.75, 1.66) | 1.25 (0.82, 1.89)                |
| Q1(≤0.162)              | 240 | 49                              | ref               | ref                              |
| Q2(0.162-0.203)         | 237 | 43                              | 0.86 (0.55, 1.36) | 0.96 (0.60, 1.53)                |
| Q3(0.203-0.266)         | 235 | 49                              | 1.03 (0.66, 1.60) | 1.07 (0.67, 1.71)                |
| Q4(>0.266)              | 235 | 49                              | 1.03 (0.66, 1.60) | 1.10 (0.69, 1.76)                |
| <b>PFHpA</b>            |     |                                 |                   |                                  |
| Continuous <sup>b</sup> | 947 | 190                             | 0.89 (0.61, 1.31) | 0.89 (0.60, 1.32)                |
| Q1(≤0.184)              | 237 | 45                              | ref               | ref                              |
| Q2(0.184-0.221)         | 236 | 51                              | 1.18 (0.75, 1.84) | 1.19 (0.75, 1.89)                |
| Q3(0.221-0.271)         | 237 | 51                              | 1.17 (0.75, 1.83) | 1.10 (0.69, 1.75)                |
| Q4(>0.271)              | 237 | 43                              | 0.95 (0.60, 1.50) | 0.91 (0.56, 1.47)                |
| <b>PFOSA</b>            |     |                                 |                   |                                  |
| Continuous <sup>b</sup> | 947 | 190                             | 0.76 (0.32, 1.76) | 0.81 (0.34, 1.96)                |
| Q1(≤0.2065)             | 240 | 44                              | ref               | ref                              |
| Q2(0.2065-0.2120)       | 241 | 56                              | 1.35 (0.87, 2.10) | 1.39 (0.87, 2.22)                |
| Q3(0.2120-0.2174)       | 232 | 38                              | 0.87 (0.54, 1.41) | 0.93 (0.57, 1.53)                |
| Q4(>0.2174)             | 234 | 52                              | 1.27 (0.81, 2.00) | 1.39 (0.87, 2.21)                |

Irregular cycle is defined as  $\geq 7$  days of variation.

<sup>a</sup>Adjusted for Age (continuous), BMI (continuous), Income (categorical), Age at menarche (continuous) and Parity (categorical). <sup>b</sup> Log-transformed PFASs as continuous variables.

**Table S3.** Associations between PFASs (ng/mL) and long cycles in preconception women in Shanghai, China, 2013-2015.

| PFASs                   | N   | Number of cycle characteristics | Crude OR (95%CI)  | Adjusted OR (95%CI) <sup>a</sup> |
|-------------------------|-----|---------------------------------|-------------------|----------------------------------|
| <b>PFDeA</b>            |     |                                 |                   |                                  |
| continuous <sup>b</sup> | 924 | 189                             | 1.10 (0.86, 1.41) | 1.12 (0.86, 1.45)                |
| Q1 (≤0.91)              | 229 | 43                              | ref               | ref                              |
| Q2 (0.91-1.31)          | 238 | 53                              | 1.24 (0.79, 1.95) | 1.22 (0.77, 1.93)                |
| Q3 (1.31-1.92)          | 224 | 47                              | 1.15 (0.72, 1.82) | 1.17 (0.73, 1.87)                |
| Q4 (>1.92)              | 233 | 46                              | 1.06 (0.67, 1.69) | 1.05 (0.65, 1.69)                |
| <b>PFUA</b>             |     |                                 |                   |                                  |
| continuous <sup>b</sup> | 924 |                                 | 1.16 (0.85, 1.57) | 1.19 (0.87, 1.63)                |
| Q1 (≤0.85)              | 232 | 39                              | ref               | ref                              |
| Q2 (0.85-1.18)          | 232 | 59                              | 1.69 (1.07, 2.66) | 1.71 (1.08, 2.72)                |
| Q3 (1.18-1.63)          | 228 | 43                              | 1.15 (0.71, 1.86) | 1.15 (0.71, 1.88)                |
| Q4 (>1.63)              | 232 | 48                              | 1.29 (0.81, 2.06) | 1.28 (0.79, 2.08)                |
| <b>PFBS</b>             |     |                                 |                   |                                  |
| continuous <sup>b</sup> | 924 | 189                             | 1.13 (0.74, 1.73) | 1.08 (0.69, 1.69)                |
| Q1 (≤0.226)             | 234 | 51                              | ref               | ref                              |
| Q2 (0.226-0.241)        | 224 | 36                              | 0.69 (0.43, 1.10) | 0.70 (0.43, 1.14)                |
| Q3 (0.241-0.266)        | 230 | 52                              | 1.05 (0.68, 1.62) | 1.05 (0.67, 1.64)                |
| Q4 (>0.266)             | 236 | 50                              | 0.97 (0.62, 1.50) | 0.97 (0.61, 1.52)                |
| <b>PFDoA</b>            |     |                                 |                   |                                  |
| continuous <sup>b</sup> | 924 | 189                             | 1.16 (0.78, 1.72) | 1.18 (0.78, 1.78)                |
| Q1 (≤0.162)             | 236 | 46                              | ref               | ref                              |
| Q2 (0.162-0.203)        | 232 | 50                              | 1.14 (0.72, 1.78) | 1.19 (0.75, 1.87)                |
| Q3 (0.203-0.266)        | 228 | 47                              | 1.07 (0.68, 1.69) | 1.09 (0.69, 1.74)                |
| Q4 (>0.266)             | 228 | 46                              | 1.04 (0.66, 1.65) | 1.03 (0.64, 1.64)                |
| <b>PFHpA</b>            |     |                                 |                   |                                  |
| continuous <sup>b</sup> | 924 | 189                             | 0.84 (0.57, 1.23) | 0.81 (0.55, 1.21)                |
| Q1 (≤0.184)             | 232 | 49                              | ref               | ref                              |
| Q2 (0.184-0.221)        | 232 | 49                              | 1.00 (0.64, 1.56) | 1.00 (0.63, 1.58)                |
| Q3 (0.221-0.271)        | 231 | 52                              | 1.09 (0.70, 1.69) | 1.03 (0.66, 1.62)                |
| Q4 (>0.271)             | 229 | 39                              | 0.77 (0.48, 1.22) | 0.73 (0.45, 1.18)                |
| <b>PFOSA</b>            |     |                                 |                   |                                  |
| continuous <sup>b</sup> | 924 | 189                             | 1.35 (0.48, 3.77) | 1.47 (0.51, 4.21)                |
| Q1 (≤0.2065)            | 233 | 44                              | ref               | ref                              |
| Q2 (0.2065-0.2120)      | 233 | 52                              | 1.23 (0.79, 1.94) | 1.31 (0.82, 2.09)                |
| Q3 (0.2120-0.2174)      | 229 | 41                              | 0.94 (0.59, 1.50) | 1.01 (0.63, 1.64)                |
| Q4 (>0.2174)            | 229 | 52                              | 1.26 (0.80, 1.98) | 1.33 (0.84, 2.12)                |

Long cycle is defined as >35 days and is compared with normal cycle as reference (21–35 days).

<sup>a</sup>Adjusted for Age (continuous), BMI (continuous), Income (categorical), Age at menarche (continuous) and Parity (categorical). <sup>b</sup>Log-transformed PFASs as continuous variables.

**Table S4.** Associations between PFASs (ng/mL) and short cycles in preconception women in Shanghai, China, 2013-2015.

| PFASs <sup>b</sup> | N   | Number of cycle characteristics | Crude OR (95%CI)    | Adjusted OR (95%CI) <sup>a</sup> |
|--------------------|-----|---------------------------------|---------------------|----------------------------------|
| PFOA               | 749 | 14                              | 0.51 (0.17, 1.55)   | 0.39 (0.10, 1.45)                |
| PFOS               | 749 | 14                              | 0.62 (0.25, 1.51)   | 0.52 (0.19, 1.42)                |
| PFNA               | 749 | 14                              | 0.62 (0.19, 2.03)   | 0.51 (0.12, 2.05)                |
| PFHxS              | 749 | 14                              | 0.82 (0.18, 3.73)   | 0.50 (0.08, 3.27)                |
| PFDeA              | 749 | 14                              | 0.69 (0.29, 1.67)   | 0.66 (0.24, 1.82)                |
| PFUA               | 749 | 14                              | 0.69 (0.24, 1.94)   | 0.64 (0.19, 2.12)                |
| PFBS               | 749 | 14                              | 0.98 (0.31, 3.06)   | 0.90 (0.28, 2.84)                |
| PFDoA              | 749 | 14                              | 0.71 (0.18, 2.76)   | 0.82 (0.18, 3.69)                |
| PFHpA              | 749 | 14                              | 0.84 (0.24, 2.96)   | 0.75 (0.21, 2.68)                |
| PFOSA              | 749 | 14                              | 3.52 (0.01, >999.9) | 5.79 (0.001, >999.9)             |

Short cycle is defined as <21 days and is compared with normal cycle as reference (21– 35 days).

<sup>a</sup>Adjusted for Age (continuous), BMI (continuous), Income (categorical), Age at menarche (continuous) and Parity (categorical). <sup>b</sup> Log-transformed PFASs as continuous variables.

**Table S5.** Associations between PFASs (ng/mL) and menorrhagia in preconception women in Shanghai, China, 2013-2015.

| PFASs                   | N   | Number of cycle characteristics | Crude OR (95%CI)  | Adjusted OR (95%CI) <sup>a</sup> |
|-------------------------|-----|---------------------------------|-------------------|----------------------------------|
| <b>PFDeA</b>            |     |                                 |                   |                                  |
| continuous <sup>b</sup> | 871 | 63                              | 0.74 (0.48, 1.13) | 0.76 (0.50, 1.17)                |
| Q1 (≤0.91)              | 220 | 17                              | ref               | ref                              |
| Q2 (0.91-1.31)          | 223 | 24                              | 1.44 (0.75, 2.76) | 1.55 (0.79, 3.03)                |
| Q3 (1.31-1.92)          | 209 | 12                              | 0.73 (0.34, 1.56) | 0.81 (0.37, 1.76)                |
| Q4 (>1.92)              | 219 | 10                              | 0.57 (0.26, 1.28) | 0.62 (0.27, 1.41)                |
| <b>PFUA</b>             |     |                                 |                   |                                  |
| continuous <sup>b</sup> | 871 | 63                              | 0.70 (0.43, 1.16) | 0.76 (0.45, 1.26)                |
| Q1 (≤0.85)              | 223 | 19                              | ref               | ref                              |
| Q2 (0.85-1.18)          | 215 | 14                              | 0.75 (0.37, 1.53) | 0.80 (0.39, 1.67)                |
| Q3 (1.18-1.63)          | 213 | 17                              | 0.93 (0.47, 1.84) | 1.02 (0.51, 2.05)                |
| Q4 (>1.63)              | 220 | 13                              | 0.67 (0.32, 1.40) | 0.75 (0.35, 1.60)                |
| <b>PFBS</b>             |     |                                 |                   |                                  |
| continuous <sup>b</sup> | 871 | 63                              | 1.37 (0.53, 3.56) | 1.30 (0.54, 3.12)                |
| Q1 (≤0.226)             | 218 | 18                              | ref               | ref                              |
| Q2 (0.226-0.241)        | 217 | 16                              | 0.88 (0.44, 1.78) | 0.88 (0.43, 1.79)                |
| Q3 (0.241-0.266)        | 215 | 16                              | 0.89 (0.44, 1.80) | 0.90 (0.45, 1.84)                |
| Q4 (>0.266)             | 221 | 13                              | 0.70 (0.33, 1.46) | 0.61 (0.28, 1.30)                |
| <b>PFDoA</b>            |     |                                 |                   |                                  |
| continuous <sup>b</sup> | 871 | 63                              | 0.74 (0.39, 1.42) | 0.80 (0.41, 1.56)                |
| Q1 (≤0.162)             | 224 | 18                              | ref               | Ref                              |
| Q2 (0.162-0.203)        | 217 | 19                              | 1.10 (0.56, 2.15) | 1.05 (0.53, 2.10)                |
| Q3 (0.203-0.266)        | 212 | 12                              | 0.69 (0.32, 1.46) | 0.74 (0.34, 1.58)                |
| Q4 (>0.266)             | 218 | 14                              | 0.79 (0.38, 1.62) | 0.86 (0.41, 1.80)                |
| <b>PFHpA</b>            |     |                                 |                   |                                  |
| continuous <sup>b</sup> | 871 | 63                              | 1.55 (0.80, 3.01) | 1.57 (0.79, 3.11)                |
| Q1 (≤0.184)             | 222 | 13                              | ref               | ref                              |
| Q2 (0.184-0.221)        | 219 | 13                              | 1.02 (0.46, 2.24) | 1.09 (0.49, 2.43)                |
| Q3 (0.221-0.271)        | 219 | 20                              | 1.62 (0.78, 3.34) | 1.54 (0.74, 3.21)                |
| Q4 (>0.271)             | 211 | 17                              | 1.41 (0.67, 2.98) | 1.37 (0.64, 2.95)                |
| <b>PFOSA</b>            |     |                                 |                   |                                  |
| continuous <sup>b</sup> | 871 | 63                              | 0.58 (0.19, 1.79) | 0.61 (0.20, 1.89)                |
| Q1 (≤0.2065)            | 219 | 19                              | ref               | ref                              |
| Q2 (0.2065-0.2120)      | 224 | 18                              | 0.92 (0.47, 1.80) | 0.97 (0.49, 1.93)                |
| Q3 (0.2120-0.2174)      | 218 | 14                              | 0.72 (0.35, 1.48) | 0.74 (0.36, 1.54)                |
| Q4 (>0.2174)            | 210 | 12                              | 0.64 (0.30, 1.35) | 0.67 (0.31, 1.43)                |

<sup>a</sup>Adjusted for Age (continuous), BMI (continuous), Income (categorical), Age at menarche (continuous) and Parity (categorical). <sup>b</sup> Log-transformed PFASs as continuous variables.

**Table S6.** Associations between PFASs (ng/mL) and hypomenorrhea in preconception women in Shanghai, China, 2013-2015.

| PFASs                   | N   | Number of cycle characteristics | Crude OR (95%CI)   | Adjusted OR (95%CI) <sup>a</sup> |
|-------------------------|-----|---------------------------------|--------------------|----------------------------------|
| <b>PFDeA</b>            |     |                                 |                    |                                  |
| continuous <sup>b</sup> | 884 | 76                              | 1.32 (0.92, 1.88)  | 1.34 (0.92, 1.95)                |
| Q1 (≤0.91)              | 218 | 15                              | ref                | ref                              |
| Q2 (0.91-1.31)          | 216 | 17                              | 1.16 (0.56, 2.38)  | 1.12 (0.54, 2.33)                |
| Q3 (1.31-1.92)          | 220 | 23                              | 1.58 (0.80, 3.12)  | 1.51 (0.75, 3.05)                |
| Q4 (>1.92)              | 230 | 21                              | 1.36 (0.68, 2.71)  | 1.38 (0.67, 2.81)                |
| <b>PFUA</b>             |     |                                 |                    |                                  |
| continuous <sup>b</sup> | 884 | 76                              | 1.20 (0.77, 1.86)  | 1.24 (0.78, 1.95)                |
| Q1 (≤0.85)              | 219 | 15                              | ref                | ref                              |
| Q2 (0.85-1.18)          | 223 | 22                              | 1.49 (0.75, 2.95)  | 1.52 (0.76, 3.05)                |
| Q3 (1.18-1.63)          | 216 | 20                              | 1.39 (0.69, 2.79)  | 1.38 (0.67, 2.83)                |
| Q4 (>1.63)              | 226 | 19                              | 1.25 (0.62, 2.52)  | 1.27 (0.61, 2.65)                |
| <b>PFBS</b>             |     |                                 |                    |                                  |
| continuous <sup>b</sup> | 884 | 76                              | 0.96 (0.58, 1.58)  | 1.48 (0.54, 4.03)                |
| Q1 (≤0.226)             | 224 | 24                              | ref                | ref                              |
| Q2 (0.226-0.241)        | 217 | 16                              | 0.66 (0.34, 1.29)  | 0.68 (0.34, 1.36)                |
| Q3 (0.241-0.266)        | 215 | 16                              | 0.67 (0.35, 1.30)  | 0.70 (0.36, 1.40)                |
| Q4 (>0.266)             | 228 | 20                              | 0.80 (0.43, 1.50)  | 0.80 (0.42, 1.53)                |
| <b>PFDOA</b>            |     |                                 |                    |                                  |
| continuous <sup>b</sup> | 884 | 76                              | 1.05 (0.58, 1.88)  | 1.11 (0.62, 2.01)                |
| Q1 (≤0.162)             | 222 | 16                              | ref                | ref                              |
| Q2 (0.162-0.203)        | 218 | 20                              | 1.30 (0.66, 2.58)  | 1.25 (0.62, 2.52)                |
| Q3 (0.203-0.266)        | 223 | 23                              | 1.48 (0.76, 2.89)  | 1.48 (0.74, 2.96)                |
| Q4 (>0.266)             | 221 | 17                              | 1.07 (0.53, 2.18)  | 1.21 (0.58, 2.50)                |
| <b>PFHpA</b>            |     |                                 |                    |                                  |
| continuous <sup>b</sup> | 884 | 76                              | 2.03 (1.11, 3.71)  | 1.92 (1.04, 3.54)                |
| Q1 (≤0.184)             | 225 | 16                              | ref                | ref                              |
| Q2 (0.184-0.221)        | 223 | 17                              | 1.08 (0.53, 2.19)  | 1.16 (0.56, 2.41)                |
| Q3 (0.221-0.271)        | 216 | 17                              | 1.12 (0.55, 2.27)  | 1.09 (0.53, 2.26)                |
| Q4 (>0.271)             | 220 | 26                              | 1.75 (0.91, 3.36)  | 1.70 (0.87, 3.31)                |
| <b>PFOSA</b>            |     |                                 |                    |                                  |
| continuous <sup>b</sup> | 884 | 76                              | 4.73 (0.23, 96.18) | 5.66 (0.20, 160.92)              |
| Q1 (≤0.2065)            | 221 | 21                              | ref                | ref                              |
| Q2 (0.2065-0.2120)      | 223 | 17                              | 0.79 (0.40, 1.53)  | 0.89 (0.45, 1.79)                |
| Q3 (0.2120-0.2174)      | 218 | 14                              | 0.65 (0.32, 1.32)  | 0.69 (0.33, 1.43)                |
| Q4 (>0.2174)            | 222 | 24                              | 1.15 (0.62, 2.14)  | 1.31 (0.68, 2.51)                |

<sup>a</sup> Adjusted for Age (continuous), BMI (continuous), Income (categorical), Age at menarche (continuous) and Parity (categorical). <sup>b</sup> Log-transformed PFASs as continuous variables.
